# Supplementary material
Source: ML conference proceedings conference paper supplement (https://proceedings.mlr.press/v139/daras21a.html)
Supplement: Supplementary file 2 [file daras21a-supp.zip]

Archive with 10 entries (9 files):
- supplementary/
- __MACOSX/._supplementary
- supplementary/mona_lisa_inpainted_eyes.mp4
- __MACOSX/supplementary/._mona_lisa_inpainted_eyes.mp4
- supplementary/.DS_Store
- __MACOSX/supplementary/._.DS_Store
- supplementary/person_to_frog.mp4
- __MACOSX/supplementary/._person_to_frog.mp4
- supplementary/supplementary.pdf
- __MACOSX/supplementary/._supplementary.pdf
